# Supplementary material for: Estimating and predicting kidney function decline in the general population
Source: bioRxiv or medRxiv preprint supplement (doi:10.1101/2024.03.30.24305107), 2024-04-01
Supplement: Supplementary file [file media-1.pdf]

**Supplementary Table S1. Anatomical Therapeutic Chemical Classification codes to define each drug**

| <b>Drug</b>                                                             | <b>Anatomical Therapeutic Chemical Classification codes</b> |
|-------------------------------------------------------------------------|-------------------------------------------------------------|
| Lipid-lowering agents (any)                                             | C10, C11                                                    |
| Statins                                                                 | C10A1                                                       |
| Antidiabetic drugs (any)                                                | A10                                                         |
| Sodium-glucose cotransporter-2 inhibitors                               | A10P1                                                       |
| Antihypertensive drugs (any)                                            | C02, C03, C07, C08, C09, C11                                |
| Angiotensin converting enzyme inhibitor or angiotensin receptor blocker | C09                                                         |
| Antiplatelet drugs                                                      | B01                                                         |

**Supplementary Table S2. List of predictor variables from 2012 to 2016 and distributions by the status of data availability from 2017 to 2021**

| Variables                                        | People with the annual health checkup results (including serum creatinine) for the first 5 years from 2012 to 2016 (N = 183 364)  |                 |                                                                                                                                     |                |
|--------------------------------------------------|-----------------------------------------------------------------------------------------------------------------------------------|-----------------|-------------------------------------------------------------------------------------------------------------------------------------|----------------|
|                                                  | People with the annual health checkup results (including serum creatinine) for the latter 5 years from 2017 to 2021 (N = 126 424) |                 | People without the annual health checkup results (including serum creatinine) for the latter 5 years from 2017 to 2021 (N = 56 926) |                |
|                                                  | Distribution                                                                                                                      | Missing         | Distribution                                                                                                                        | Missing        |
| Age (years)                                      | Mean 45.2, SD 8.6                                                                                                                 | 0 (0%)          | Mean 48.6, SD 11.8                                                                                                                  | 0 (0%)         |
| Sex                                              | Men: 104 219 (82.4%), Women: 22 205 (17.6%)                                                                                       | 0 (0%)          | Men: 39 367 (69.2%), Women: 17 559 (30.9%)                                                                                          | 0 (0%)         |
| <b>Results of annual health checkups in 2016</b> |                                                                                                                                   |                 |                                                                                                                                     |                |
| eGFR (ml/min/1.73m <sup>2</sup> )                | Mean 79.0, SD 13.4                                                                                                                | 0 (0%)          | Mean 78.0, SD 14.7                                                                                                                  | 0 (0%)         |
| Body mass index (kg/m <sup>2</sup> )             | Mean 23.4, SD 3.6                                                                                                                 | 18 (0.01%)      | Mean 23.1, SD 3.6                                                                                                                   | 24 (0.04%)     |
| Abdominal circumference (cm)                     | Mean 82.6, SD 9.6                                                                                                                 | 10 435 (8.3%)   | Mean 82.3, SD 9.7                                                                                                                   | 7 575 (13.3%)  |
| Systolic blood pressure (mmHg)                   | Mean 121.6, SD 14.4                                                                                                               | 20 (0.02%)      | Mean 121.9, SD 15.8                                                                                                                 | 20 (0.04%)     |
| Diastolic blood pressure (mmHg)                  | Mean 75.6, SD 11.1                                                                                                                | 20 (0.02%)      | Mean 75.1, SD 11.4                                                                                                                  | 20 (0.04%)     |
| Triglycerides (mg/dl)                            | Mean 115.7, SD 91.6                                                                                                               | 31 (0.02%)      | Mean 110.1, SD 83.5                                                                                                                 | 31 (0.1%)      |
| High density lipoprotein cholesterol (mg/dl)     | Mean 60.7, SD 16.1                                                                                                                | 17 (0.01%)      | Mean 63.3, SD 17.0                                                                                                                  | 27 (0.1%)      |
| Low density lipoprotein cholesterol (mg/dl)      | Mean 120.7, SD 29.7                                                                                                               | 29 (0.02%)      | Mean 120.0, SD 30.4                                                                                                                 | 32 (0.1%)      |
| Total cholesterol (mg/dl)                        | Mean 201.8, SD 33.6                                                                                                               | 76 961 (60.9%)  | Mean 204.4, SD 34.4                                                                                                                 | 31 767 (55.8%) |
| Aspartate aminotransferase (U/l)                 | Mean 22.4, SD 10.1                                                                                                                | 14 (0.01%)      | Mean 22.4, SD 11.1                                                                                                                  | 18 (0.03%)     |
| Alanine aminotransferase (U/l)                   | Mean 25.3, SD 18.8                                                                                                                | 14 (0.01%)      | Mean 23.3, SD 17.6                                                                                                                  | 18 (0.03%)     |
| Gamma glutamyl transpeptidase (U/l)              | Mean 39.8, SD 43.4                                                                                                                | 30 (0.02%)      | Mean 38.4, SD 46.0                                                                                                                  | 36 (0.1%)      |
| Fasting blood sugar (mg/dl)                      | Mean 94.4, SD 16.7                                                                                                                | 27 532 (21.8%)  | Mean 96.3, SD 18.7                                                                                                                  | 7 882 (13.9%)  |
| Casual blood sugar (mg/dl)                       | Mean 98.5, SD 25.9                                                                                                                | 116 912 (92.5%) | Mean 100.0, SD 29.9                                                                                                                 | 51 751 (90.9%) |
| Hemoglobin A1c (NGSP) (%)                        | Mean 5.5, SD 0.6                                                                                                                  | 37 179 (29.4%)  | Mean 5.6, SD 0.7                                                                                                                    | 16 951 (29.8%) |
| Hematocrit (%)                                   | Mean 45.1, SD 3.8                                                                                                                 | 6 895 (5.5%)    | Mean 44.1, SD 4.0                                                                                                                   | 1 423 (2.5%)   |

|                                                     |                                                                                         |                |                                                                                        |              |
|-----------------------------------------------------|-----------------------------------------------------------------------------------------|----------------|----------------------------------------------------------------------------------------|--------------|
| Hemoglobin (g/dl)                                   | Mean 14.8, SD 1.3                                                                       | 790 (0.6%)     | Mean 14.5, SD 1.5                                                                      | 332 (0.6%)   |
| Red blood cells (10 <sup>6</sup> /μl)               | Mean 488.1, SD 41.1                                                                     | 575 (0.5%)     | Mean 478.2, SD 44.5                                                                    | 268 (0.5%)   |
| Serum uric acid (mg/dl)                             | Mean 5.7, SD 1.3                                                                        | 6 429 (5.1%)   | Mean 5.5, SD 1.4                                                                       | 2 827 (5.0%) |
| Urinary sugar (dipstick test)                       | -: 120 612 (95.4%), +/-: 628 (0.5%), +: 738 (0.6%), ++: 477 (0.4%), +++: 906 (0.7%)     | 3 063 (2.4%)   | -: 54 629 (96.0%), +/-: 299 (0.5%), +: 364 (0.6%), ++: 302 (0.5%), +++: 496 (0.9%)     | 836 (1.5%)   |
| Urinary protein (dipstick test)                     | -: 112 157 (88.7%), +/-: 7 961 (6.3%), +: 2 437 (1.9%), ++: 656 (0.5%), +++: 166 (0.1%) | 3 047 (2.4%)   | -: 50 443 (88.6%), +/-: 3 918 (6.9%), +: 1 195 (2.1%), ++: 440 (0.8%), +++: 111 (0.2%) | 819 (1.4%)   |
| Smoking status                                      | Yes: 36 760 (29.1%), No: 81 194 (64.2%)                                                 | 8 470 (6.7%)   | Yes: 13 758 (24.2%), No: 40 282 (70.8%)                                                | 2 886 (5.1%) |
| Drinking habits                                     | Every day: 31 809 (25.2%), Sometimes: 37 867 (30.0%), Rarely/none: 47 576 (37.6%)       | 9 172 (7.3%)   | Every day: 13 927 (24.5%), Sometimes: 16 133 (28.3%), Rarely/none: 23 024 (40.5%)      | 3 842 (6.8%) |
| Exercise (≥2/week and ≥30 minutes in the past year) | Yes: 22 549 (17.8%), No: 86 889 (68.7%)                                                 | 16 986 (13.4%) | Yes: 12 117 (21.3%), No: 39 685 (69.7%)                                                | 5 124 (9.0%) |
| <b>Prescriptions in 2016</b>                        |                                                                                         |                |                                                                                        |              |
| Lipid-lowering agents (any)                         | Yes: 12 979 (10.3%), No: 113 445 (89.7%)                                                | 0 (0%)         | Yes: 8 176 (14.4%), No: 48 750 (85.6%)                                                 | 0 (0%)       |
| Statins                                             | Yes: 10 262 (8.1%), No: 116 162 (91.9%)                                                 | 0 (0%)         | Yes: 6 619 (11.6%), No: 50 307 (88.4%)                                                 | 0 (0%)       |
| Antidiabetic drugs (any)                            | Yes: 4 428 (3.5%), No: 121 996 (96.5%)                                                  | 0 (0%)         | Yes: 3 077 (5.4%), No: 53 849 (94.6%)                                                  | 0 (0%)       |
| Sodium-glucose cotransporter-2 inhibitors           | Yes: 1 106 (0.9%), No: 125 318 (99.1%)                                                  | 0 (0%)         | Yes: 565 (1.0%), No: 56 361 (99.0%)                                                    | 0 (0%)       |
| Antihypertensive drugs (any)                        | Yes: 14 885 (11.8%), No: 111 539 (88.2%)                                                | 0 (0%)         | Yes: 9 939 (17.5%), No: 46 987 (82.5%)                                                 | 0 (0%)       |

|                                                  |                                                                              |                 |                                                                             |                |
|--------------------------------------------------|------------------------------------------------------------------------------|-----------------|-----------------------------------------------------------------------------|----------------|
| ACEI or ARB                                      | Yes: 10 038 (7.9%), No: 116 386 (92.1%)                                      | 0 (0%)          | Yes: 6 610 (11.6%), No: 50 316 (88.4%)                                      | 0 (0%)         |
| Antiplatelet drugs                               | Yes: 2 948 (2.3%), No: 123 476 (97.7%)                                       | 0 (0%)          | Yes: 2 470 (4.3%), No: 54 456 (95.7%)                                       | 0 (0%)         |
| <b>Results of annual health checkups in 2015</b> |                                                                              |                 |                                                                             |                |
| eGFR (ml/min/1.73m <sup>2</sup> )                | Mean 80.3, SD 13.5                                                           | 0 (0%)          | Mean 78.9, SD 14.7                                                          | 0 (0%)         |
| Body mass index (kg/m <sup>2</sup> )             | Mean 23.3, SD 3.6                                                            | 17 (0.01%)      | Mean 23.0, SD 3.6                                                           | 7 (0.01%)      |
| Abdominal circumference (cm)                     | Mean 82.3, SD 9.6                                                            | 11 784 (9.3%)   | Mean 82.1, SD 9.7                                                           | 7 836 (13.8%)  |
| Systolic blood pressure (mmHg)                   | Mean 121.2, SD 14.3                                                          | 12 (0.01%)      | Mean 121.4, SD 15.6                                                         | 9 (0.02%)      |
| Diastolic blood pressure (mmHg)                  | Mean 75.1, SD 11.0                                                           | 12 (0.01%)      | Mean 74.7, SD 11.4                                                          | 9 (0.02%)      |
| Triglycerides (mg/dl)                            | Mean 114.4, SD 88.7                                                          | 113 (0.1%)      | Mean 109.3, SD 86.8                                                         | 81 (0.1%)      |
| High density lipoprotein cholesterol (mg/dl)     | Mean 60.7, SD 16.1                                                           | 18 (0.01%)      | Mean 63.1, SD 16.9                                                          | 17 (0.03%)     |
| Low density lipoprotein cholesterol (mg/dl)      | Mean 120.4, SD 30.1                                                          | 22 (0.02%)      | Mean 119.7, SD 30.7                                                         | 19 (0.03%)     |
| Total cholesterol (mg/dl)                        | Mean 201.2, SD 33.7                                                          | 76 955 (60.9%)  | Mean 204.1, SD 34.5                                                         | 31 883 (56.0%) |
| Aspartate aminotransferase (U/l)                 | Mean 22.3, SD 10.5                                                           | 13 (0.01%)      | Mean 22.2, SD 11.3                                                          | 5 (0.01%)      |
| Alanine aminotransferase (U/l)                   | Mean 25.0, SD 18.7                                                           | 14 (0.01%)      | Mean 23.0, SD 17.4                                                          | 5 (0.01%)      |
| Gamma glutamyl transpeptidase (U/l)              | Mean 39.0, SD 42.8                                                           | 28 (0.02%)      | Mean 37.8, SD 46.1                                                          | 13 (0.02%)     |
| Fasting blood sugar (mg/dl)                      | Mean 93.9, SD 16.6                                                           | 28 416 (22.5%)  | Mean 95.8, SD 18.1                                                          | 8 169 (14.4%)  |
| Casual blood sugar (mg/dl)                       | Mean 96.7, SD 22.3                                                           | 111 655 (88.3%) | Mean 98.1, SD 24.7                                                          | 49 606 (87.1%) |
| Hemoglobin A1c (NGSP) (%)                        | Mean 5.5, SD 0.6                                                             | 37 914 (30.0%)  | Mean 5.6, SD 0.7                                                            | 17 226 (30.3%) |
| Hematocrit (%)                                   | Mean 44.8, SD 3.7                                                            | 6 725 (5.3%)    | Mean 43.9, SD 3.9                                                           | 1 335 (2.4%)   |
| Hemoglobin (g/dl)                                | Mean 14.8, SD 1.3                                                            | 854 (0.7%)      | Mean 14.5, SD 1.5                                                           | 323 (0.6%)     |
| Red blood cells (10 <sup>6</sup> /μl)            | Mean 487.3, SD 40.2                                                          | 650 (0.5%)      | Mean 477.6, SD 43.2                                                         | 266 (0.5%)     |
| Serum uric acid (mg/dl)                          | Mean 5.7, SD 1.3                                                             | 6 169 (4.9%)    | Mean 5.5, SD 1.4                                                            | 2 627 (4.6%)   |
| Urinary sugar (dipstick test)                    | -: 120 725 (95.5%), +/-: 572 (0.5%), +: 696 (0.6%), ++: 460 (0.4%), +++: 580 | 3 391 (2.7%)    | -: 54 795 (96.3%), +/-: 262 (0.5%), +: 352 (0.6%), ++: 265 (0.5%), +++: 338 | 914 (1.6%)     |

|                                                                   |                                                                                               |                |                                                                                              |              |
|-------------------------------------------------------------------|-----------------------------------------------------------------------------------------------|----------------|----------------------------------------------------------------------------------------------|--------------|
|                                                                   | (0.5%)                                                                                        |                | (0.6%)                                                                                       |              |
| Urinary protein (dipstick test)                                   | -: 112 527 (89.0%), +/-: 7 488 (5.9%),<br>+: 2 239 (1.8%), ++: 632 (0.5%), +++:<br>157 (0.1%) | 3 381 (2.7%)   | -: 50 824 (89.3%), +/-: 3 532 (6.2%),<br>+: 1 138 (2.0%), ++: 412 (0.7%), +++:<br>111 (0.2%) | 909 (1.6%)   |
| Smoking status                                                    | Yes: 36 852 (29.2%), No: 80 155<br>(63.4%)                                                    | 9 417 (7.5%)   | Yes: 13 936 (24.5%), No: 39 904<br>(70.1%)                                                   | 3 086 (5.4%) |
| Drinking habits                                                   | Every day: 31 681 (25.1%), Sometimes:<br>37 583 (29.7%), Rarely/none: 46 447<br>(36.7%)       | 10 713 (8.5%)  | Every day: 14 001 (24.6%),<br>Sometimes: 16 266 (28.6%),<br>Rarely/none: 22 487 (39.5%)      | 4 172 (7.3%) |
| Exercise ( $\geq 2$ /week and $\geq 30$ minutes in the past year) | Yes: 21 683 (17.2%), No: 86 077<br>(68.1%)                                                    | 18 664 (14.8%) | Yes: 11 683 (20.5%), No: 39 644<br>(69.6%)                                                   | 5 599 (9.8%) |
| <b>Prescriptions in 2015</b>                                      |                                                                                               |                |                                                                                              |              |
| Lipid-lowering agents (any)                                       | Yes: 12 126 (9.6%), No: 114 298<br>(90.4%)                                                    | 0 (0%)         | Yes: 7 700 (13.5%), No: 49 226<br>(86.5%)                                                    | 0 (0%)       |
| Statins                                                           | Yes: 9 562 (7.6%), No: 116 862 (92.4%)                                                        | 0 (0%)         | Yes: 6 244 (11.0%), No: 50 682<br>(89.0%)                                                    | 0 (0%)       |
| Antidiabetic drugs (any)                                          | Yes: 3 994 (3.2%), No: 122 430 (96.8%)                                                        | 0 (0%)         | Yes: 2 844 (5.0%), No: 54 082<br>(95.0%)                                                     | 0 (0%)       |
| Sodium-glucose cotransporter-2 inhibitors                         | Yes: 652 (0.5%), No: 125 772 (99.5%)                                                          | 0 (0%)         | Yes: 344 (0.6%), No: 56 582 (99.4%)                                                          | 0 (0%)       |
| Antihypertensive drugs (any)                                      | Yes: 13 581 (10.7%), No: 112 843<br>(89.3%)                                                   | 0 (0%)         | Yes: 9 172 (16.1%), No: 47 754<br>(83.9%)                                                    | 0 (0%)       |
| ACEI or ARB                                                       | Yes: 9 212 (7.3%), No: 117 212 (92.7%)                                                        | 0 (0%)         | Yes: 6 166 (10.8%), No: 50 760<br>(89.2%)                                                    | 0 (0%)       |
| Antiplatelet drugs                                                | Yes: 2 808 (2.2%), No: 123 616 (97.8%)                                                        | 0 (0%)         | Yes: 2 206 (3.9%), No: 54 720<br>(96.1%)                                                     | 0 (0%)       |
| <b>Results of annual health checkups in 2014</b>                  |                                                                                               |                |                                                                                              |              |

|                                              |                                                                                         |                 |                                                                                        |                |
|----------------------------------------------|-----------------------------------------------------------------------------------------|-----------------|----------------------------------------------------------------------------------------|----------------|
| eGFR (ml/min/1.73m <sup>2</sup> )            | Mean 81.6, SD 13.7                                                                      | 0 (0%)          | Mean 80.2, SD 15.0                                                                     | 0 (0%)         |
| Body mass index (kg/m <sup>2</sup> )         | Mean 23.3, SD 3.6                                                                       | 19 (0.02%)      | Mean 22.9, SD 3.6                                                                      | 8 (0.01%)      |
| Abdominal circumference (cm)                 | Mean 82.1, SD 9.5                                                                       | 13 300 (10.5%)  | Mean 81.8, SD 9.6                                                                      | 8 053 (14.2%)  |
| Systolic blood pressure (mmHg)               | Mean 121.0, SD 14.2                                                                     | 18 (0.01%)      | Mean 121.0, SD 15.5                                                                    | 6 (0.01%)      |
| Diastolic blood pressure (mmHg)              | Mean 74.8, SD 10.9                                                                      | 18 (0.01%)      | Mean 74.4, SD 11.3                                                                     | 6 (0.01%)      |
| Triglycerides (mg/dl)                        | Mean 114.1, SD 88.9                                                                     | 520 (0.4%)      | Mean 108.2, SD 84.0                                                                    | 215 (0.4%)     |
| High density lipoprotein cholesterol (mg/dl) | Mean 60.8, SD 15.9                                                                      | 27 (0.02%)      | Mean 63.2, SD 16.7                                                                     | 9 (0.02%)      |
| Low density lipoprotein cholesterol (mg/dl)  | Mean 120.1, SD 30.1                                                                     | 30 (0.02%)      | Mean 119.5, SD 30.7                                                                    | 13 (0.02%)     |
| Total cholesterol (mg/dl)                    | Mean 199.7, SD 33.3                                                                     | 76 679 (60.7%)  | Mean 202.7, SD 34.3                                                                    | 31 776 (55.8%) |
| Aspartate aminotransferase (U/l)             | Mean 22.0, SD 10.3                                                                      | 14 (0.01%)      | Mean 21.9, SD 10.4                                                                     | 1 (0.002%)     |
| Alanine aminotransferase (U/l)               | Mean 25.0, SD 19.3                                                                      | 15 (0.01%)      | Mean 22.9, SD 17.0                                                                     | 1 (0.002%)     |
| Gamma glutamyl transpeptidase (U/l)          | Mean 38.1, SD 41.3                                                                      | 22 (0.02%)      | Mean 36.8, SD 43.7                                                                     | 18 (0.03%)     |
| Fasting blood sugar (mg/dl)                  | Mean 93.2, SD 16.6                                                                      | 28 453 (22.5%)  | Mean 95.3, SD 18.4                                                                     | 8 179 (14.4%)  |
| Casual blood sugar (mg/dl)                   | Mean 96.4, SD 21.8                                                                      | 111 352 (88.1%) | Mean 98.0, SD 25.3                                                                     | 49 513 (87.0%) |
| Hemoglobin A1c (NGSP) (%)                    | Mean 5.5, SD 0.6                                                                        | 37 912 (30.0%)  | Mean 5.6, SD 0.6                                                                       | 17 450 (30.7%) |
| Hematocrit (%)                               | Mean 44.7, SD 3.7                                                                       | 6 669 (5.3%)    | Mean 43.8, SD 4.0                                                                      | 1 250 (2.2%)   |
| Hemoglobin (g/dl)                            | Mean 14.8, SD 1.4                                                                       | 716 (0.6%)      | Mean 14.5, SD 1.5                                                                      | 221 (0.4%)     |
| Red blood cells (10 <sup>6</sup> /μl)        | Mean 486.4, SD 40.3                                                                     | 542 (0.4%)      | Mean 477.1, SD 43.2                                                                    | 183 (0.3%)     |
| Serum uric acid (mg/dl)                      | Mean 5.7, SD 1.3                                                                        | 5 877 (4.7%)    | Mean 5.5, SD 1.4                                                                       | 2 355 (4.1%)   |
| Urinary sugar (dipstick test)                | -: 119 976 (94.9%), +/-: 604 (0.5%), +: 740 (0.6%), ++: 402 (0.3%), +++: 435 (0.3%)     | 4 267 (3.4%)    | -: 54 527 (95.8%), +/-: 286 (0.5%), +: 349 (0.6%), ++: 257 (0.5%), +++: 274 (0.5%)     | 1 233 (2.2%)   |
| Urinary protein (dipstick test)              | -: 110 475 (87.4%), +/-: 8 440 (6.7%), +: 2 478 (2.0%), ++: 610 (0.5%), +++: 135 (0.1%) | 4 286 (3.4%)    | -: 49 664 (87.2%), +/-: 4 253 (7.5%), +: 1 250 (2.2%), ++: 396 (0.7%), +++: 109 (0.2%) | 1 254 (2.2%)   |
| Smoking status                               | Yes: 37 275 (29.5%), No: 78 734                                                         | 10 415 (8.2%)   | Yes: 14 217 (25.0%), No: 39 378                                                        | 3 331 (5.9%)   |

|                                                                   |                                                                                   |                |                                                                                   |               |
|-------------------------------------------------------------------|-----------------------------------------------------------------------------------|----------------|-----------------------------------------------------------------------------------|---------------|
|                                                                   | (62.3%)                                                                           |                | (69.2%)                                                                           |               |
| Drinking habits                                                   | Every day: 31 036 (24.6%), Sometimes: 37 515 (29.7%), Rarely/none: 46 230 (36.6%) | 11 643 (9.2%)  | Every day: 13 753 (24.2%), Sometimes: 16 350 (28.7%), Rarely/none: 22 275 (39.1%) | 4 548 (8.0%)  |
| Exercise ( $\geq 2$ /week and $\geq 30$ minutes in the past year) | Yes: 20 893 (16.5%), No: 86 372 (68.3%)                                           | 19 159 (15.2%) | Yes: 11 338 (19.9%), No: 39 778 (69.9%)                                           | 5 810 (10.2%) |
| <b>Prescriptions in 2014</b>                                      |                                                                                   |                |                                                                                   |               |
| Lipid-lowering agents (any)                                       | Yes: 11 312 (9.0%), No: 115 112 (91.1%)                                           | 0 (0%)         | Yes: 7 246 (12.7%), No: 49 680 (87.3%)                                            | 0 (0%)        |
| Statins                                                           | Yes: 8 902 (7.0%), No: 117 522 (93.0%)                                            | 0 (0%)         | Yes: 5 869 (10.3%), No: 51 057 (89.7%)                                            | 0 (0%)        |
| Antidiabetic drugs (any)                                          | Yes: 3 557 (2.8%), No: 122 867 (97.2%)                                            | 0 (0%)         | Yes: 2 655 (4.7%), No: 54 271 (95.3%)                                             | 0 (0%)        |
| Sodium-glucose cotransporter-2 inhibitors                         | Yes: 225 (0.2%), No: 126 199 (99.8%)                                              | 0 (0%)         | Yes: 149 (0.3%), No: 56 777 (99.7%)                                               | 0 (0%)        |
| Antihypertensive drugs (any)                                      | Yes: 12 410 (9.8%), No: 114 014 (90.2%)                                           | 0 (0%)         | Yes: 8 581 (15.1%), No: 48 345 (84.9%)                                            | 0 (0%)        |
| ACEI or ARB                                                       | Yes: 8 500 (6.7%), No: 117 924 (93.3%)                                            | 0 (0%)         | Yes: 5 766 (10.1%), No: 51 160 (89.9%)                                            | 0 (0%)        |
| Antiplatelet drugs                                                | Yes: 2 567 (2.0%), No: 123 857 (98.0%)                                            | 0 (0%)         | Yes: 2 005 (3.5%), No: 54 921 (96.5%)                                             | 0 (0%)        |
| <b>Results of annual health checkups in 2013</b>                  |                                                                                   |                |                                                                                   |               |
| eGFR (ml/min/1.73m <sup>2</sup> )                                 | Mean 82.0, SD 13.9                                                                | 0 (0%)         | Mean 80.8, SD 15.1                                                                | 0 (0%)        |
| Body mass index (kg/m <sup>2</sup> )                              | Mean 23.2, SD 3.6                                                                 | 23 (0.02%)     | Mean 22.9, SD 3.5                                                                 | 44 (0.1%)     |
| Abdominal circumference (cm)                                      | Mean 81.9, SD 9.5                                                                 | 16 434 (13.0%) | Mean 81.7, SD 9.5                                                                 | 8 594 (15.1%) |
| Systolic blood pressure (mmHg)                                    | Mean 120.8, SD 14.2                                                               | 21 (0.02%)     | Mean 120.8, SD 15.4                                                               | 40 (0.1%)     |
| Diastolic blood pressure (mmHg)                                   | Mean 74.5, SD 10.9                                                                | 21 (0.02%)     | Mean 74.2, SD 11.3                                                                | 40 (0.1%)     |

|                                              |                                                                                         |                 |                                                                                        |                |
|----------------------------------------------|-----------------------------------------------------------------------------------------|-----------------|----------------------------------------------------------------------------------------|----------------|
| Triglycerides (mg/dl)                        | Mean 113.8, SD 88.6                                                                     | 527 (0.4%)      | Mean 108.5, SD 85.0                                                                    | 246 (0.4%)     |
| High density lipoprotein cholesterol (mg/dl) | Mean 60.2, SD 15.6                                                                      | 30 (0.02%)      | Mean 62.3, SD 16.5                                                                     | 40 (0.1%)      |
| Low density lipoprotein cholesterol (mg/dl)  | Mean 118.6, SD 30.1                                                                     | 35 (0.03%)      | Mean 118.1, SD 30.7                                                                    | 43 (0.1%)      |
| Total cholesterol (mg/dl)                    | Mean 199.2, SD 33.6                                                                     | 83 023 (65.7%)  | Mean 202.1, SD 34.7                                                                    | 34 701 (61.0%) |
| Aspartate aminotransferase (U/l)             | Mean 21.9, SD 10.1                                                                      | 10 (0.01%)      | Mean 21.8, SD 10.1                                                                     | 33 (0.1%)      |
| Alanine aminotransferase (U/l)               | Mean 25.0, SD 19.0                                                                      | 11 (0.01%)      | Mean 22.9, SD 17.2                                                                     | 33 (0.1%)      |
| Gamma glutamyl transpeptidase (U/l)          | Mean 37.7, SD 41.0                                                                      | 17 (0.01%)      | Mean 36.7, SD 43.6                                                                     | 37 (0.1%)      |
| Fasting blood sugar (mg/dl)                  | Mean 93.0, SD 16.9                                                                      | 25 009 (19.8%)  | Mean 95.1, SD 19.1                                                                     | 6 841 (12.0%)  |
| Casual blood sugar (mg/dl)                   | Mean 96.1, SD 22.4                                                                      | 111 921 (88.5%) | Mean 97.7, SD 26.3                                                                     | 49 954 (87.8%) |
| Hemoglobin A1c (NGSP) (%)                    | Mean 5.5, SD 0.6                                                                        | 38 181 (30.2%)  | Mean 5.6, SD 0.7                                                                       | 17 683 (31.1%) |
| Hematocrit (%)                               | Mean 44.9, SD 3.8                                                                       | 6 818 (5.4%)    | Mean 44.0, SD 4.0                                                                      | 1 380 (2.4%)   |
| Hemoglobin (g/dl)                            | Mean 14.9, SD 1.4                                                                       | 840 (0.7%)      | Mean 14.6, SD 1.5                                                                      | 349 (0.6%)     |
| Red blood cells (10 <sup>6</sup> /μl)        | Mean 487.3, SD 40.8                                                                     | 704 (0.6%)      | Mean 477.8, SD 43.4                                                                    | 301 (0.5%)     |
| Serum uric acid (mg/dl)                      | Mean 5.6, SD 1.3                                                                        | 22 535 (17.8%)  | Mean 5.4, SD 1.4                                                                       | 8 235 (14.5%)  |
| Urinary sugar (dipstick test)                | -: 120 795 (95.6%), +/-: 607 (0.5%), +: 721 (0.6%), ++: 381 (0.3%), +++: 386 (0.3%)     | 3 534 (2.8%)    | -: 54 570 (95.9%), +/-: 298 (0.5%), +: 364 (0.6%), ++: 239 (0.4%), +++: 234 (0.4%)     | 1 221 (2.1%)   |
| Urinary protein (dipstick test)              | -: 111 202 (88.0%), +/-: 8 282 (6.6%), +: 2 666 (2.1%), ++: 604 (0.5%), +++: 141 (0.1%) | 3 529 (2.8%)    | -: 49 847 (87.6%), +/-: 4 131 (7.3%), +: 1 317 (2.3%), ++: 338 (0.6%), +++: 105 (0.2%) | 1 188 (2.1%)   |
| Smoking status                               | Yes: 37 797 (29.9%), No: 77 016 (60.9%)                                                 | 11 611 (9.2%)   | Yes: 14 589 (25.6%), No: 38 693 (68.0%)                                                | 3 644 (6.4%)   |
| Drinking habits                              | Every day: 30 487 (24.1%), Sometimes: 36 935 (29.2%), Rarely/none: 45 664 (36.1%)       | 13 338 (10.6%)  | Every day: 13 612 (23.9%), Sometimes: 16 252 (28.6%), Rarely/none: 22 056 (38.8%)      | 5 006 (8.8%)   |
| Exercise (≥2/week and ≥30 minutes in the     | Yes: 19 992 (15.8%), No: 85 555                                                         | 20 877 (16.5%)  | Yes: 10 795 (19.0%), No: 39 821                                                        | 6 310 (11.1%)  |



|                                                  |                                         |                |                                        |                |
|--------------------------------------------------|-----------------------------------------|----------------|----------------------------------------|----------------|
| past year)                                       | (67.7%)                                 |                | (70.0%)                                |                |
| <b>Prescriptions in 2013</b>                     |                                         |                |                                        |                |
| Lipid-lowering agents (any)                      | Yes: 10 573 (8.4%), No: 115 851 (91.6%) | 0 (0%)         | Yes: 6 845 (12.0%), No: 50 081 (88.0%) | 0 (0%)         |
| Statins                                          | Yes: 8 278 (6.6%), No: 118 146 (93.5%)  | 0 (0%)         | Yes: 5 516 (9.7%), No: 51 410 (90.3%)  | 0 (0%)         |
| Antidiabetic drugs (any)                         | Yes: 3 189 (2.5%), No: 123 235 (97.5%)  | 0 (0%)         | Yes: 2 405 (4.2%), No: 54 521 (95.8%)  | 0 (0%)         |
| Sodium-glucose cotransporter-2 inhibitors        | No: 126 424 (100.0%)                    | 0 (0%)         | No: 56 926 (100.0%)                    | 0 (0%)         |
| Antihypertensive drugs (any)                     | Yes: 11 391 (9.0%), No: 115 033 (91.0%) | 0 (0%)         | Yes: 8 052 (14.1%), No: 48 874 (85.9%) | 0 (0%)         |
| ACEI or ARB                                      | Yes: 7 806 (6.2%), No: 118 618 (93.8%)  | 0 (0%)         | Yes: 5 466 (9.6%), No: 51 460 (90.4%)  | 0 (0%)         |
| Antiplatelet drugs                               | Yes: 2 424 (1.9%), No: 124 000 (98.1%)  | 0 (0%)         | Yes: 1 852 (3.3%), No: 55 074 (96.8%)  | 0 (0%)         |
| <b>Results of annual health checkups in 2012</b> |                                         |                |                                        |                |
| eGFR (ml/min/1.73m <sup>2</sup> )                | Mean 82.4, SD 14.3                      | 0 (0%)         | Mean 80.8, SD 15.1                     | 0 (0%)         |
| Body mass index (kg/m <sup>2</sup> )             | Mean 23.1, SD 3.5                       | 13 (0.01%)     | Mean 22.8, SD 3.5                      | 33 (0.1%)      |
| Abdominal circumference (cm)                     | Mean 81.8, SD 9.5                       | 19 936 (15.8%) | Mean 81.7, SD 9.5                      | 9 196 (16.2%)  |
| Systolic blood pressure (mmHg)                   | Mean 120.7, SD 14.1                     | 9 (0.01%)      | Mean 120.6, SD 15.4                    | 30 (0.1%)      |
| Diastolic blood pressure (mmHg)                  | Mean 74.2, SD 10.8                      | 9 (0.01%)      | Mean 74.0, SD 11.4                     | 30 (0.1%)      |
| Triglycerides (mg/dl)                            | Mean 113.2, SD 87.0                     | 969 (0.8%)     | Mean 107.5, SD 82.2                    | 278 (0.5%)     |
| High density lipoprotein cholesterol (mg/dl)     | Mean 60.4, SD 15.6                      | 724 (0.6%)     | Mean 62.5, SD 16.3                     | 221 (0.4%)     |
| Low density lipoprotein cholesterol (mg/dl)      | Mean 118.3, SD 30.2                     | 731 (0.6%)     | Mean 118.1, SD 30.9                    | 227 (0.4%)     |
| Total cholesterol (mg/dl)                        | Mean 198.7, SD 33.6                     | 89 514 (70.8%) | Mean 200.8, SD 34.9                    | 36 789 (64.6%) |
| Aspartate aminotransferase (U/l)                 | Mean 21.9, SD 11.0                      | 5 (0.004%)     | Mean 21.7, SD 11.3                     | 27 (0.1%)      |

|                                                     |                                                                                         |                 |                                                                                       |                |
|-----------------------------------------------------|-----------------------------------------------------------------------------------------|-----------------|---------------------------------------------------------------------------------------|----------------|
| Alanine aminotransferase (U/l)                      | Mean 25.0, SD 19.5                                                                      | 6 (0.005%)      | Mean 22.9, SD 17.6                                                                    | 29 (0.1%)      |
| Gamma glutamyl transpeptidase (U/l)                 | Mean 37.4, SD 40.5                                                                      | 12 (0.01%)      | Mean 36.6, SD 44.4                                                                    | 36 (0.1%)      |
| Fasting blood sugar (mg/dl)                         | Mean 92.6, SD 16.9                                                                      | 14 956 (11.8%)  | Mean 94.4, SD 18.9                                                                    | 4 593 (8.1%)   |
| Casual blood sugar (mg/dl)                          | Mean 94.8, SD 23.1                                                                      | 117 465 (92.9%) | Mean 94.7, SD 23.9                                                                    | 52 191 (91.7%) |
| Hemoglobin A1c (NGSP) (%)                           | Mean 5.4, SD 0.6                                                                        | 41 942 (33.2%)  | Mean 5.5, SD 0.7                                                                      | 20 479 (36.0%) |
| Hematocrit (%)                                      | Mean 45.0, SD 3.8                                                                       | 6 195 (4.9%)    | Mean 44.1, SD 4.2                                                                     | 1 136 (2.0%)   |
| Hemoglobin (g/dl)                                   | Mean 14.8, SD 1.4                                                                       | 234 (0.2%)      | Mean 14.5, SD 1.5                                                                     | 103 (0.2%)     |
| Red blood cells (10 <sup>6</sup> /μl)               | Mean 487.8, SD 40.3                                                                     | 55 (0.04%)      | Mean 478.0, SD 43.2                                                                   | 56 (0.1%)      |
| Serum uric acid (mg/dl)                             | Mean 5.6, SD 1.4                                                                        | 25 669 (20.3%)  | Mean 5.4, SD 1.4                                                                      | 10 836 (19.0%) |
| Urinary sugar (dipstick test)                       | -: 119 282 (94.4%), +/-: 567 (0.5%), +: 659 (0.5%), ++: 371 (0.3%), +++: 364 (0.3%)     | 5 181 (4.1%)    | -: 54 319 (95.4%), +/-: 321 (0.6%), +: 358 (0.6%), ++: 222 (0.4%), +++: 235 (0.4%)    | 1 471 (2.6%)   |
| Urinary protein (dipstick test)                     | -: 110 283 (87.2%), +/-: 7 857 (6.2%), +: 2 408 (1.9%), ++: 571 (0.5%), +++: 125 (0.1%) | 5 180 (4.1%)    | -: 49 760 (87.4%), +/-: 4 056 (7.1%), +: 1 208 (2.1%), ++: 362 (0.6%), +++: 92 (0.2%) | 1 448 (2.5%)   |
| Smoking status                                      | Yes: 37 908 (30.0%), No: 75 713 (59.9%)                                                 | 12 803 (10.1%)  | Yes: 14 788 (26.0%), No: 38 176 (67.1%)                                               | 3 962 (7.0%)   |
| Drinking habits                                     | Every day: 30 076 (23.8%), Sometimes: 37 057 (29.3%), Rarely/none: 44 043 (34.8%)       | 15 248 (12.1%)  | Every day: 13 445 (23.6%), Sometimes: 16 379 (28.8%), Rarely/none: 21 607 (38.0%)     | 5 495 (9.7%)   |
| Exercise (≥2/week and ≥30 minutes in the past year) | Yes: 19 101 (15.1%), No: 83 716 (66.2%)                                                 | 23 607 (18.7%)  | Yes: 10 384 (18.2%), No: 39 540 (69.5%)                                               | 7 002 (12.3%)  |
| <b>Prescriptions in 2012</b>                        |                                                                                         |                 |                                                                                       |                |
| Lipid-lowering agents (any)                         | Yes: 9 672 (7.7%), No: 116 752 (92.4%)                                                  | 0 (0%)          | Yes: 6 233 (11.0%), No: 50 693 (89.1%)                                                | 0 (0%)         |
| Statins                                             | Yes: 7 576 (6.0%), No: 118 848 (94.0%)                                                  | 0 (0%)          | Yes: 5 050 (8.9%), No: 51 876 (89.1%)                                                 | 0 (0%)         |

|                                           |                                         |        |                                        |        |
|-------------------------------------------|-----------------------------------------|--------|----------------------------------------|--------|
|                                           |                                         |        | (91.1%)                                |        |
| Antidiabetic drugs (any)                  | Yes: 2 821 (2.2%), No: 123 603 (97.8%)  | 0 (0%) | Yes: 2 185 (3.8%), No: 54 741 (96.2%)  | 0 (0%) |
| Sodium-glucose cotransporter-2 inhibitors | No: 126 424 (100.0%)                    | 0 (0%) | No: 56 926 (100.0%)                    | 0 (0%) |
| Antihypertensive drugs (any)              | Yes: 10 245 (8.1%), No: 116 179 (91.9%) | 0 (0%) | Yes: 7 406 (13.0%), No: 49 520 (87.0%) | 0 (0%) |
| ACEI or ARB                               | Yes: 6 943 (5.5%), No: 119 481 (94.5%)  | 0 (0%) | Yes: 5 021 (8.8%), No: 51 905 (91.2%)  | 0 (0%) |
| Antiplatelet drugs                        | Yes: 2 248 (1.8%), No: 124 176 (98.2%)  | 0 (0%) | Yes: 1 744 (3.1%), No: 55 182 (96.9%)  | 0 (0%) |

SD=standard deviation, eGFR=estimated glomerular filtration rate, NGSP=National Glycohemoglobin Standardization Program, ACEI=angiotensin converting enzyme inhibitor, ARB=angiotensin receptor blocker.

**Supplementary Figure S1. Study flow chart**

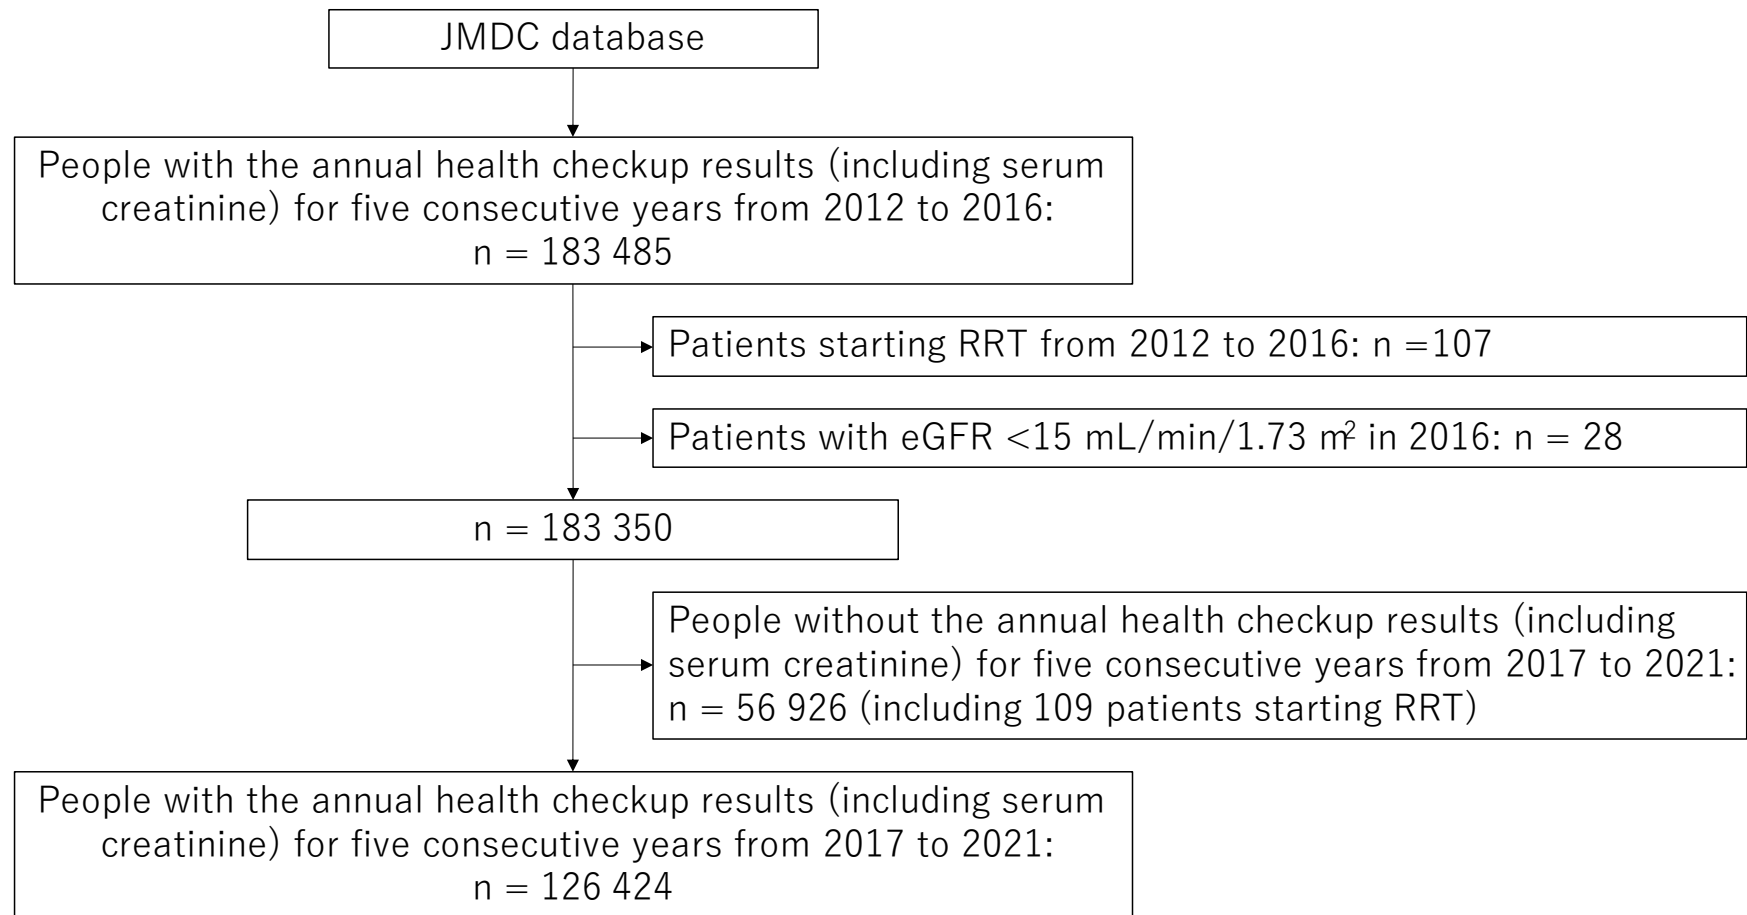

RRT, renal replacement therapy; eGFR = estimated glomerular filtration rate.

**Supplementary Table S3. The mean (standard deviation) slope of eGFR (ml/min/1.73 m<sup>2</sup>/year) for the 10 years by age, sex, and KDIGO GFR stages in 2016**

| <b>Men:</b>                                                               | <b>&lt;40 years</b>               | <b>40–49 years</b>                | <b>50–59 years</b>                | <b>≥60 years</b>                 |
|---------------------------------------------------------------------------|-----------------------------------|-----------------------------------|-----------------------------------|----------------------------------|
| <b>KDIGO stage G1: eGFR ≥90 ml/min/1.73 m<sup>2</sup>/year in 2016</b>    | n = 9 776<br>Mean -1.19, SD 1.14  | n = 6 458<br>Mean -1.03, SD 1.22  | n = 3 387<br>Mean -0.80, SD 1.23  | n = 156<br>Mean -0.63, SD 1.21   |
| <b>KDIGO stage G2: eGFR 60–89 ml/min/1.73 m<sup>2</sup>/year in 2016</b>  | n = 18 540<br>Mean -0.99, SD 0.88 | n = 32 673<br>Mean -0.89, SD 0.86 | n = 25 189<br>Mean -0.69, SD 0.89 | n = 2 244<br>Mean -0.63, SD 0.91 |
| <b>KDIGO stage G3a: eGFR 45–59 ml/min/1.73 m<sup>2</sup>/year in 2016</b> | n = 165<br>Mean -0.99, SD 1.06    | n = 1 809<br>Mean -0.85, SD 0.87  | n = 2 972<br>Mean -0.73, SD 0.90  | n = 607<br>Mean -0.64, SD 0.87   |
| <b>KDIGO stage G3b: eGFR 30–44 ml/min/1.73 m<sup>2</sup>/year in 2016</b> | n = 6<br>Mean -0.70, SD 1.67      | n = 40<br>Mean -1.22, SD 1.40     | n = 128<br>Mean -1.33, SD 1.53    | n = 45<br>Mean -0.93, SD 1.17    |
| <b>KDIGO stage G4: eGFR 15–29 ml/min/1.73 m<sup>2</sup>/year in 2016</b>  | n = 1<br>Mean -0.84, SD n/a       | n = 12<br>Mean -1.07, SD 1.24     | n = 10<br>Mean -1.47, SD 1.38     | n = 1<br>Mean -1.56, SD n/a      |
| <b>Women:</b>                                                             | <b>&lt;40 years</b>               | <b>40–49 years</b>                | <b>50–59 years</b>                | <b>≥60 years</b>                 |
| <b>KDIGO stage G1: eGFR ≥90 ml/min/1.73 m<sup>2</sup>/year in 2016</b>    | n = 1 499<br>Mean -1.20, SD 1.34  | n = 1 927<br>Mean -1.18, SD 1.28  | n = 594<br>Mean -1.05, SD 1.32    | n = 53<br>Mean -0.93, SD 1.20    |
| <b>KDIGO stage G2: eGFR 60–89 ml/min/1.73 m<sup>2</sup>/year in 2016</b>  | n = 2 208<br>Mean -1.00, SD 1.04  | n = 8 881<br>Mean -0.89, SD 0.92  | n = 5 274<br>Mean -0.78, SD 0.89  | n = 507<br>Mean -0.71, SD 0.91   |
| <b>KDIGO stage G3a: eGFR 45–59 ml/min/1.73 m<sup>2</sup>/year in 2016</b> | n = 23<br>Mean -0.73, SD 0.65     | n = 390<br>Mean -0.74, SD 0.67    | n = 724<br>Mean -0.70, SD 0.75    | n = 91<br>Mean -0.70, SD 0.77    |
| <b>KDIGO stage G3b: eGFR 30–44 ml/min/1.73 m<sup>2</sup>/year in 2016</b> | n = 1<br>Mean -0.29, SD n/a       | n = 6<br>Mean -1.33, SD 1.19      | n = 16<br>Mean -1.27, SD 1.25     | n = 5<br>Mean -1.03, SD 0.30     |
| <b>KDIGO stage G4: eGFR 15–29 ml/min/1.73 m<sup>2</sup>/year in 2016</b>  | n = 1<br>Mean -0.43, SD n/a       | n = 2<br>Mean -1.73, SD 2.11      | n = 3<br>Mean -2.26, SD 1.01      | n = 0<br>Mean n/a, SD n/a        |

KDIGO, Kidney Disease Improving Global Outcomes; eGFR, estimated glomerular filtration rate; SD, standard deviation.
